# Supplementary material
Source: PubMed Central journal article supplement (PMC10369303)
Supplement: NIHMS1912435-supplement-1.pdf [file NIHMS1912435-supplement-1.pdf]

# Cell Metabolism Final File Checklist

If you have questions concerning these guidelines, please contact our journal office at [metabolism@cell.com](mailto:metabolism@cell.com)

## MAIN DOCUMENT

---

### FORMAT

For copyediting and typesetting purposes, the main document must be provided as a modifiable electronic file in a PC-compatible format (preferably a Word file). If your paper was created in LaTeX format, please include the following files: the main .pdf file, the .tex file, as well as all supporting files such as .bbl, .bib., .sty, .bst, etc. Please note that LaTeX submissions require conversion after acceptance, so we ask that you carefully review formulas and mathematical symbols in proofs. For more information on LaTeX submissions, please refer to this [LaTeX instructions page](#).

The main document must include the following sections (in this order): title; author list and affiliations; Lead Contact footnote; email address(es) of corresponding author(s); Summary; Introduction; Results; Discussion; Acknowledgments; Author Contributions; Declaration of Interests; main figure titles and legends; main tables and legends; STAR Methods text; supplemental video, data, and Excel table title and legends; and References.

### AUTHORSHIP POLICY

- Please review our [Information for Authors](#) page to ensure that authorship footnoting adheres to our revised authorship policy.
- All manuscripts must indicate a **Lead Contact** on the title page (and in the STAR Methods) and must adhere to the authorship policy guidelines.
- An Author Contributions section is required for all primary research papers. This section should provide information about individual author contributions to the paper and should be placed immediately after the Acknowledgments section. Please keep this section as concise as possible and use initials to indicate author identity. We are happy for you to use a traditional format such as “A.B. and C.D. conducted the experiments, E.F. designed the experiments and wrote the paper...” but would encourage you to consider using the [CRedit taxonomy](#) instead.

### TITLE PAGE

- The title should contain no more than 150 characters, including spaces.
- Author names should be spelled out in the author list, rather than set in initials (First name Surname). Please note: we will not make changes to this section after publication, so it is essential that all authors approve the spelling of their names and affiliations before you upload your final files.
- A complete affiliation, including the department(s) or subunit(s), institution name, city, state/region, postal code, and country, should be provided for each author.
- An email address should be included for each corresponding author.
- The Lead Contact should be designated with a footnote in the author list.
- The Summary should consist of a single paragraph of 150 words or fewer.

### BODY

The main document should contain no more than 7,000 words for Articles and 4,000 words for Short Articles. All text in the document is included in the total word count, with the exception of the STAR Methods, supplemental video and Excel table legends, and References. Submission of a paper that exceeds these limits will delay scheduling for publication. If you need to shorten the text, it is usually easiest to do so by eliminating redundancies; for example, it is not necessary to re-state the key findings in the Discussion. You can also remove details of experimental protocols from the Results and figure legends.

- The STAR Methods section should be in the main document and should appear after the figure legends. Please report your methods with sufficient detail so readers do not need to refer to other papers to understand how procedures were performed. Please consult materials on our [STAR Methods website](#) for further details.
- The mandatory “Lead Contact” statement should provide the full name and email address for the author taking responsibility for the Lead Contact role. This should match the Lead Contact designated in the Title page.
- The first section of STAR Methods, “Resource Availability,” must include the following three subheadings: “Lead Contact,” “Materials Availability,” and “Data and Code Availability.” Each of these subheadings should be followed by a statement, as described in greater detail on our [STAR Methods website](#).
- The mandatory “Materials Availability” statement should report where any materials generated in this study are being made available. If the study did not generate new unique reagents or there are restrictions to availability, this should be mentioned in the statement.
- The mandatory “Data and Code Availability” statement should be made according to the [STAR Methods guidelines](#).
- If your study was pre-registered, please make sure you include information about where the pre-registration information can be accessed (such as clinical trial registry numbers and associated links) in the “Additional Resources” section of the STAR Methods.
- The words “new” or “novel” should not be used as priority claims or to refer to chemical compounds or structures.
- We require gene nomenclature to conform to the standards set by HUGO, MGI, FlyBase, WormBase, SGI, and other oversight organizations. Please confirm that the capitalization, italicization, and style of the gene names within your paper are consistent with the rules set by one or more of these databases.
- Equations should be created with MathType. We will also accept equations created using Microsoft Word’s Equation Editor. However, MathType is preferable due to some of Equation Editor’s limitations around version compatibility and editing.

## CITATIONS/REFERENCES

- References** must be cited by superscript numbers running consecutively in the text, e.g., “Multiple reports support this observation<sup>1,2</sup>” or “This observation is supported by Smith et al.<sup>1</sup>” References should include only articles that are published or in press.
- Article references should include the author list, year, article title, journal abbreviation, volume, page range, and DOI. (For references to articles that have only published online in advance of their issue’s publication, an online publication date and a DOI number must be provided.)
- Book references should include the author list, year, title, publisher (but not a publisher location), and, where applicable, chapter title and editors.
- All supplemental figures and items (tables, datasets, and videos, etc.) should be cited in the main document (which includes the STAR Methods section) at least once.
- All datasets, program code, and methods used in your manuscript must be appropriately cited in the text and listed in the reference section, either in the form of the publications where they were first reported or in the form of independent persistent identifiers such as the Digital Object Identifier (DOI). When a dataset, program code, or method has a persistent identifier independent from the original study where it is first reported, we encourage you to cite both that identifier and the original study. Please see the References section in our Information for Authors, [How to Prepare and Submit Research Articles](#), for details on how references should be presented.
- A supplemental references list should be included at the end of the primary supplemental PDF for any references cited in the SI or SI legends. These references should be cited in bracketed numbers and numbered sequentially by first citation occurrence (starting with [S1]). Any references from the main text that are also cited in the SI or SI legends should be included in the supplemental references, along with the references cited exclusively in the SI, and should be numbered by their position in the sequence of supplemental citations rather than by their numbering in the main text. (Please note that the key resources table and STAR Methods text are *not* considered part of the SI.)

## MAIN ITEMS

- 
- A Short Article should contain no more than 4 main figures and/or tables and a Research Article should contain no more than 7 figures and/or tables.
  - Main figures** should be uploaded individually, as separate high-resolution TIFF or PDF files. All of the panels of each figure should be printed together on a single page and should be organized as they will appear in the journal.
  - If you are reorganizing or renumbering any items (main or supplemental) please re-upload all new files and remove the old versions to ensure correct correspondence between items and legends.
  - Please check your figures carefully to ensure that they have been prepared in accordance with the [Cell Press Data Processing Policy](#). For example, if you have digitally eliminated irrelevant or superfluous lanes from a gel or blot image, you must indicate the position of the deletion with a line or a space and explain the manipulation in the figure legend. If images in figures are composites, please indicate this within the Figure legend or STAR Methods for clarity.
  - For figures containing graphs the data should be presented in a format to show the full data distribution (i.e. dot-plots of individual data points or box-and-whisker plots). All box plot elements should be defined. If bar graphs are used, dot plots should be overlaid to show individual data points.
  - The figure legends, main and Supplemental, should state the statistical test(s) used and the value of the P values indicated by asterisk(s) in the figure should be defined. This information can be added at the end of each legend; for example formatted as “\*P < 0.05, \*\*P < 0.01 by Student’s t-test (A, F, H) or by 2-way ANOVA (K, L).”
  - The figure legends, main and Supplemental, should state the number of biological and technical replicates for each result. For example, as “(A) Western blot of liver tissue from WT and KO mice on a high-fat diet for 8 weeks (n = 3 technical replicates from 5 biological replicates for each strain).”
  - Figures containing micrographs should include scale bars, and the accompanying figure legends should appropriately reference scale bar size. For any figures presenting pooled data and/or error bars, the measures should be defined in the figure legends. For example, “Data are represented as mean ± SEM.”
  - Figures are required to include a descriptive title (e.g., Figure 1. [Title]).
  - Tables should be formatted as editable MS Word tables—not as images—with contents separated into individual cells forming a grid. Tables should include a descriptive title (mandatory), and the footnotes and/or legend (optional) should be concise.
  - Tables should not be separated into panels; i.e., they are numbered as Table 1, Table 2, etc., not as Table 1A, Table 1B, etc. Please do not include line breaks, merged cells, colors, shading, or tabs to separate data.
  - Figure and table legends should reference any related supplemental items if applicable. For example, the end of a Figure 1 legend might read, “See also Figure S1 and Table S1.”
  - The Key Resources Table should be populated using our [KRT webform](#) or the [template](#) provided on our [STAR Methods website](#) using the standardized subheadings as appropriate. Customized subheadings should not be added to the Key Resources Table. References cited within the Key Resources Table must also be included in the Reference list. Please upload the completed Key Resources Table as a separate Word document within Editorial Manager.

## SUPPLEMENTAL ITEMS

---

- A comprehensive PDF should contain all supplemental high-resolution figures and PDF-format tables and their titles and legends (note that figures can be no longer than 1 page each). The PDF should be considered ready for publication and should be uploaded with your final files. This text will not be copyedited. (Please see the [Supplemental Guidelines](#) for more detailed information.)
- The total number of supplemental figures should not exceed the number of main figures/tables; in addition, the total number of supplemental items (figures, tables, videos, etc.) may not exceed two times the number of display items in the main paper. For example, a paper containing 7 figures may also include up to 7 supplemental figures; it should include a maximum of 14 supplemental items overall.

- Titles of all supplemental figures and items should be descriptive and reference a main item or the STAR Methods (e.g., “Table S1. [Title], Related to Figure 1” or “Figure S3. [Title], Related to STAR Methods”).
- Supplemental tables exceeding 3 pages in length should instead be provided as individual Excel files. If necessary for organization, supplemental Excel tables may include tabs. Descriptive titles, including “Related to” information (mandatory), and legends (optional) for Excel-format tables should be included in the main document, after the STAR Methods text.
- Supplemental Videos should be uploaded as separate files in .mov, .avi., mpg., or .mp4 format and should meet the specifications listed under “Multimedia Files” in the [Supplemental Guidelines](#). Descriptive titles, including “Related to” information (mandatory), and legends (optional) for Supplemental Videos should be included in the main document, after the STAR Methods text. (Please note that videos may not be viewable at specifications other than those described in the link above.)
- The Supplemental file Data S1 must include the raw, unprocessed data used to generate the final figures (main and Supplemental) in the paper. Please see [the instructions](#) on how to assemble this file. Also make sure the file has been appropriately updated from previous versions if any relevant display items in the paper have been added or changed. Data S1 should be called out in the ‘Data and code availability’ statement in the STAR Methods, as well as in the Key Resources Table under the ‘Deposited Data’ subheading.

## ASSOCIATED FILES AND FORMS

---

- Please upload a single Word document that includes your Highlights and eTOC blurb. Highlights are 3–4 bullet points of no more than 85 characters in length, including spaces, and they summarize the core results of the paper in order to allow readers to quickly gain an understanding of the main take-home messages. An eTOC blurb should also be included that is no longer than 50 words describing the context and significance of the findings for the broader journal readership. When writing this paragraph, please target it to non-specialists by highlighting the major conceptual point of the paper in plain language, without extensive experimental detail. The blurb must be written in the third person and refer to “First Author et al.”
- Please download a copy of our [Declaration of Interests form](#), fill it out electronically, and upload the form as a submission item along with your final submission. We also ask that declarations stated on the form, including declarations that confirm there are no competing interests, be included in the manuscript in a section titled “Declaration of Interests” after the Author Contributions section.
- A completed copy of our [Inclusion and Diversity form](#) must be filled out electronically and uploaded as a submission item along with your final submission. For more information, please see our [Author Guidelines](#) and [FAQ page](#).
- If you have chosen to provide pertinent information within the submitted Inclusion and Diversity form, and optionally would like to publish an inclusion and diversity statement, we also ask that any statements selected on the form be included in the manuscript in a section titled “Inclusion and Diversity” following the Declaration of Interests section. For more information, please see our [Author Guidelines](#) and [FAQ page](#).
- Please include a copy of permissions received for any figures reprinted or adapted from previous publications.
- Please follow these specifications to submit your Graphical Abstract: The image should be an exact square, 1200 x 1200 pixels in dimension at 300 dpi with 12–16 point Arial font. Preferred file types are TIFF, PDF, or JPG. Please refer to our [guidelines](#) for more in-depth tips for creating a Graphical Abstract.
- The name and email address of an alternate contact should be noted in the Additional Information section of the submissions system, Editorial Manager.

## OPTIONAL FEATURES

---

- The Figure360 video is published alongside the corresponding figure in the article. Guidelines for creating Figure360s and examples can be found [here](#). Give the reader a fun way to digest your figure by creating a

descriptive video of one of your figures to help the reader quickly and effectively grasp the major points of that figure. Upload your Figure360 video along with your finalized manuscript files.

Methods Videos, short videos to improve the transparency of a specific piece of the methods published in a scientific research article, should be uploaded as separate files in .mov, .avi, mpg., or .mp4 format and should meet the specifications listed on our [Methods Video page](#). Descriptive titles (mandatory) and legends (optional) should be included in the main manuscript file, after the figure titles and legends. (Please note that videos may not be viewable at specifications other than those described in the link above.)

We encourage you to publish your original, unprocessed data alongside your Cell Press paper through [Mendeley Data](#). We will link your published paper to the dataset and will also link your dataset back to the published paper. For more information, please click [here](#).
