# Supplementary material
Source: PubMed Central journal article supplement (PMC10369303)
Supplement: NIHMS1912435-supplement-2.pdf [file NIHMS1912435-supplement-2.pdf]

## **Supplemental material**

### **Daytime feeding with prolonged fasting times reaps greater geroprotective effects when combined with calorie restriction in adult female mice**

The document contains 5 supplemental figures and 5 supplemental tables.

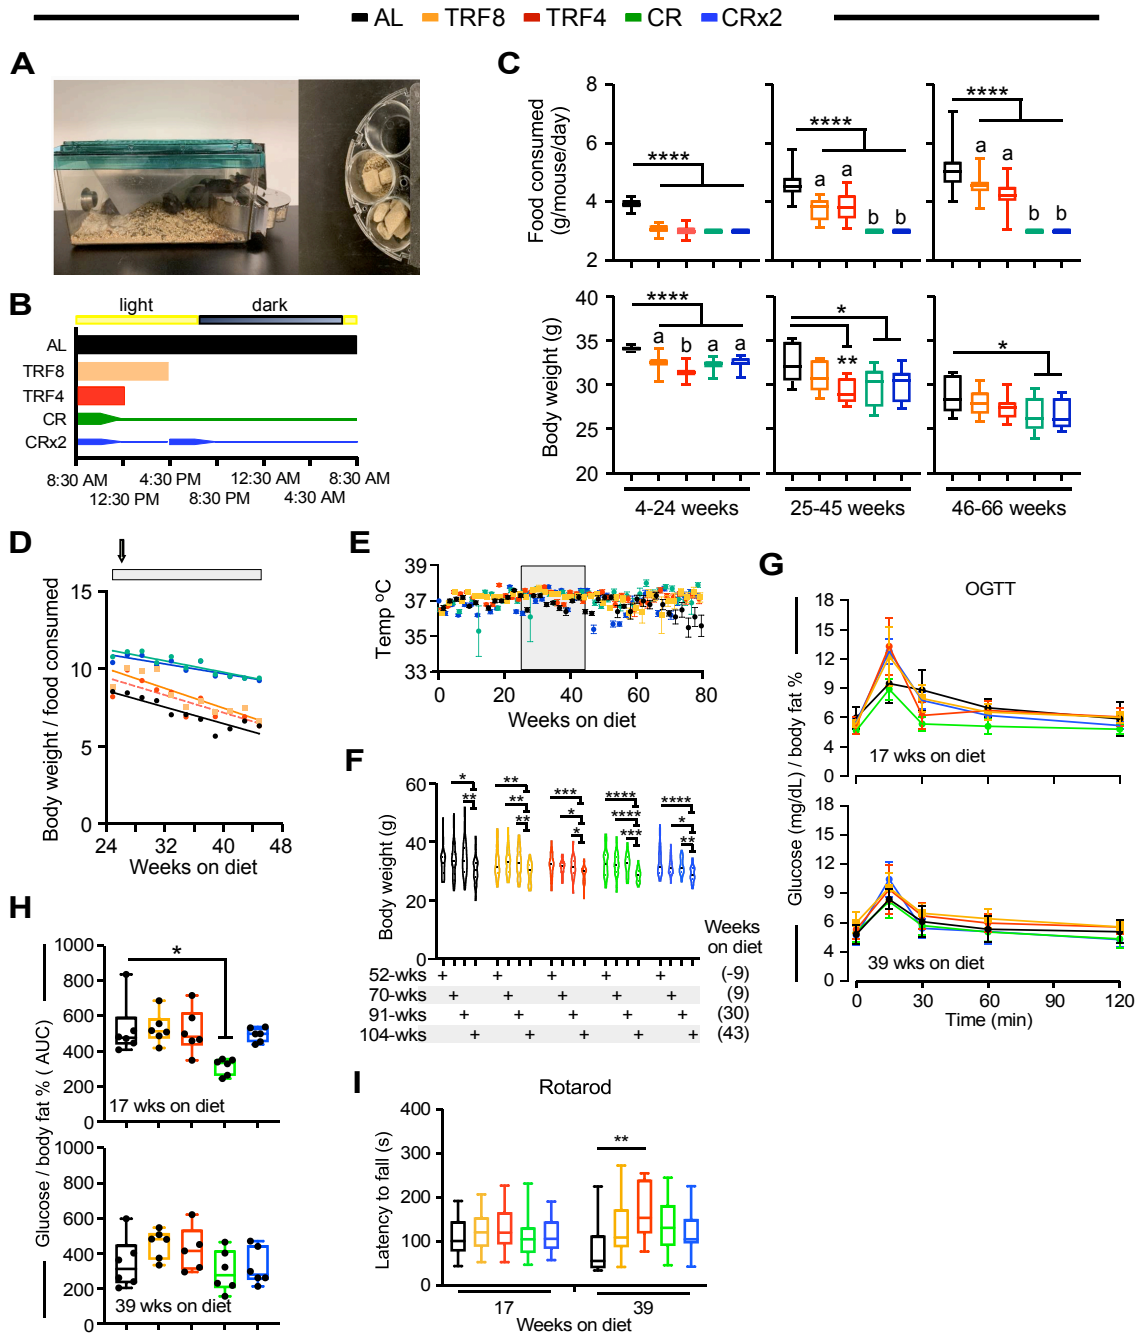

**Figure S1. Effect of late onset feeding regime on food consumption, body weight, glucose metabolism, and physical performance in female mice.**

(A) Configuration of manual 7-day feeder carousel onto mouse cage.

(B) Graphical representation of the experimental protocol.

(C) Discrete 20-week binning was performed to assess the effect of feeding regime on the amount of food consumed (upper panels) and body weight changes (lower panels): bin 1, 4-24 weeks (left panels); bin 2, 25-45 weeks (middle panels); bin 3, 46-66 weeks (right panels).

(D) Focus on trajectories of body weight (upper panel) and the ratio of 'body weight / amount of food consumed' (bottom panel) for the period between 25-45 weeks after diet switching. Arrow, bleed at 26 weeks for metabolomics analysis. See Data S1 for additional details.

(E) Trajectories of core temperature over the course of 80 weeks under the indicated feeding regimens. Data are expressed as means  $\pm$  95% confidence intervals (CI). Gray box indicates a period of volitional increase in food consumption (25-45 weeks after diet switching) by mice fed AL, TRF8, and TRF4.

(F) Mouse body weight at the onset of body composition assessment by low-field nuclear magnetic resonance imaging. Data distribution is visualized as violin plots with a marker for the median.

(G) Trajectories of blood glucose clearance during an OGTT after normalization by body fat content. Values are represented as means  $\pm$  SD.  $n = 6$  per group.

(H) Area under the curve (AUC) from the OGTT experiment depicted in panel F.

(I) Latency to fall off the rotarod.

(C,H,I) Values are represented as boxplots depicting minimum, lower quartile (Q1), median (Q2), upper quartile (Q3) and maximum values. Data have been analyzed using one-way ANOVA. \*, \*\*, \*\*\*\*  $p < 0.05$ , 0.01, 0.0001. Different lowercase letters indicate significant differences at  $p < 0.05$  (panel C).

Related to Figure 1.

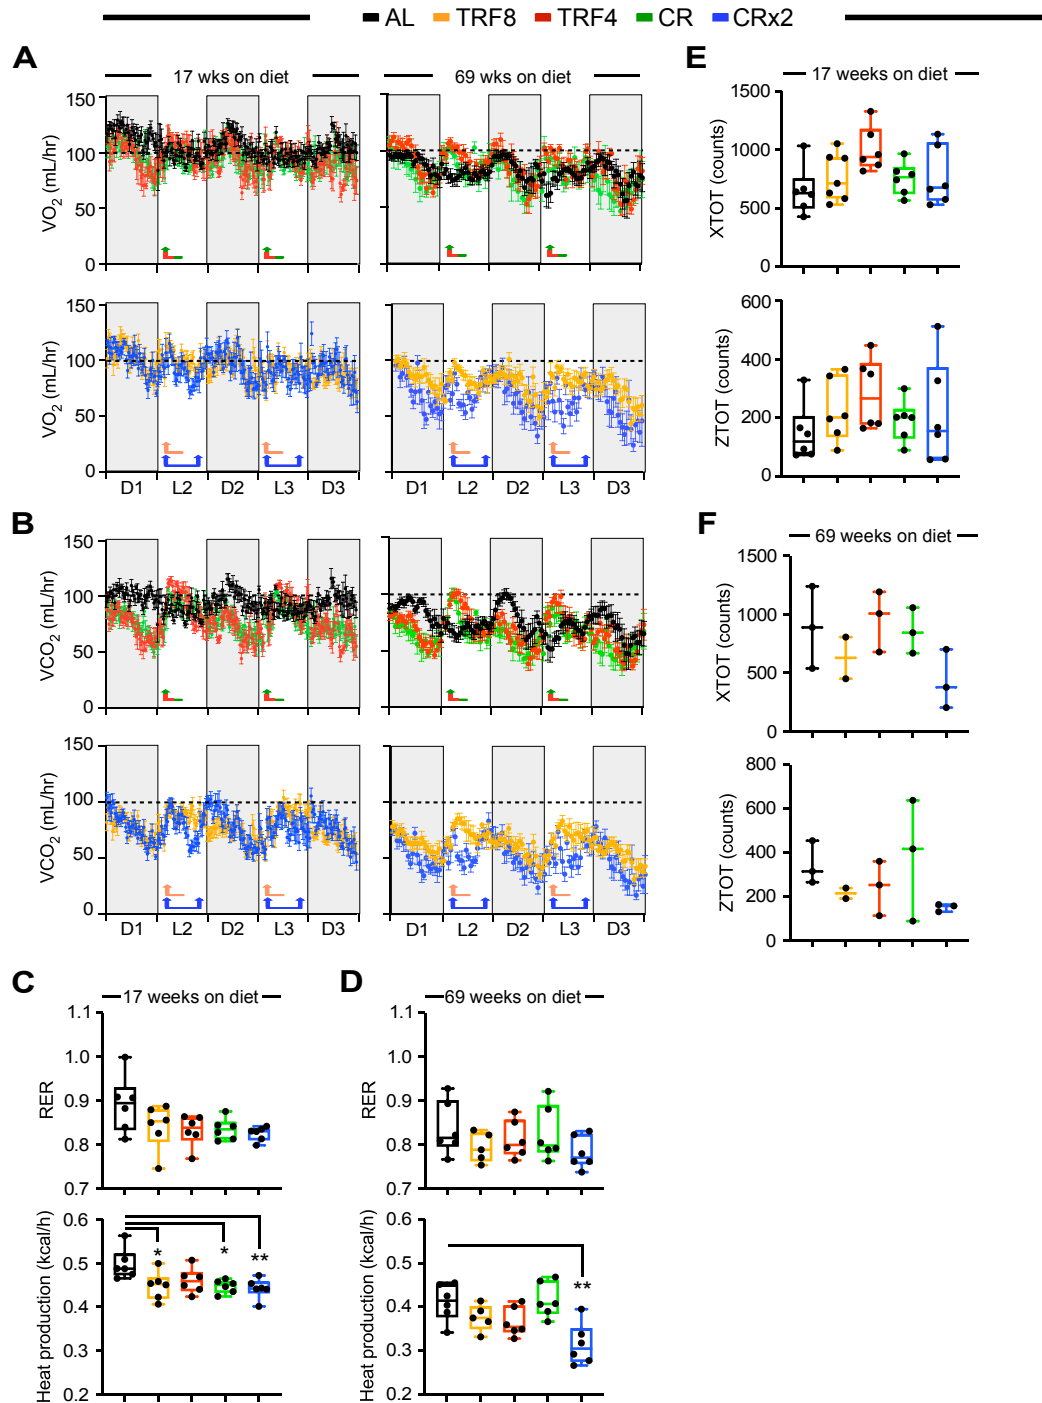

**Figure S2. Metabolic adaption to various feeding regimens in female mice.**

Mice exposed to the indicated feeding regime for 17 and 69 weeks were placed into metabolic cages for 72 h to measure  $VO_2$ ,  $VCO_2$ , respiratory exchange ratio (RER), energy expenditure (EE), and locomotor activity. The values associated with the first 12 h acclimatization phase (L1) were discarded.

(A, B) Averaged hourly trajectories of O<sub>2</sub> consumption (A) and CO<sub>2</sub> production (B) were captured during 3 dark (D) and 2 light (L) cycles. Arrows indicate feeding time (8:30 AM for all groups and 4:30 PM for CRx2 only). Values represent average  $\pm$  SD, with n = 6-7 mice per group.

(C, D) The averaged RER (upper panels) and heat production (bottom panels) values were collected over 60 h from metabolic caged mice after a 17-week (C) or 69-week (D) intervention period. Data are represented as box and whisker plots, depicting minimum, lower quartile (Q1), median (Q2), upper quartile (Q3) and maximum values.

(E, F) Locomotor activity in x axis (XTOT, upper panels) and z axis (ZTOT, bottom panels) was measured in metabolic caged mice after a 17-week (E, n=6 mice per group) or 69-week (F, n=2-3 mice per group) intervention period.

One-way ANOVA coupled with Dunnett's post-hoc test was performed.

Related to Figure 2.

Most probable cause of death analysis

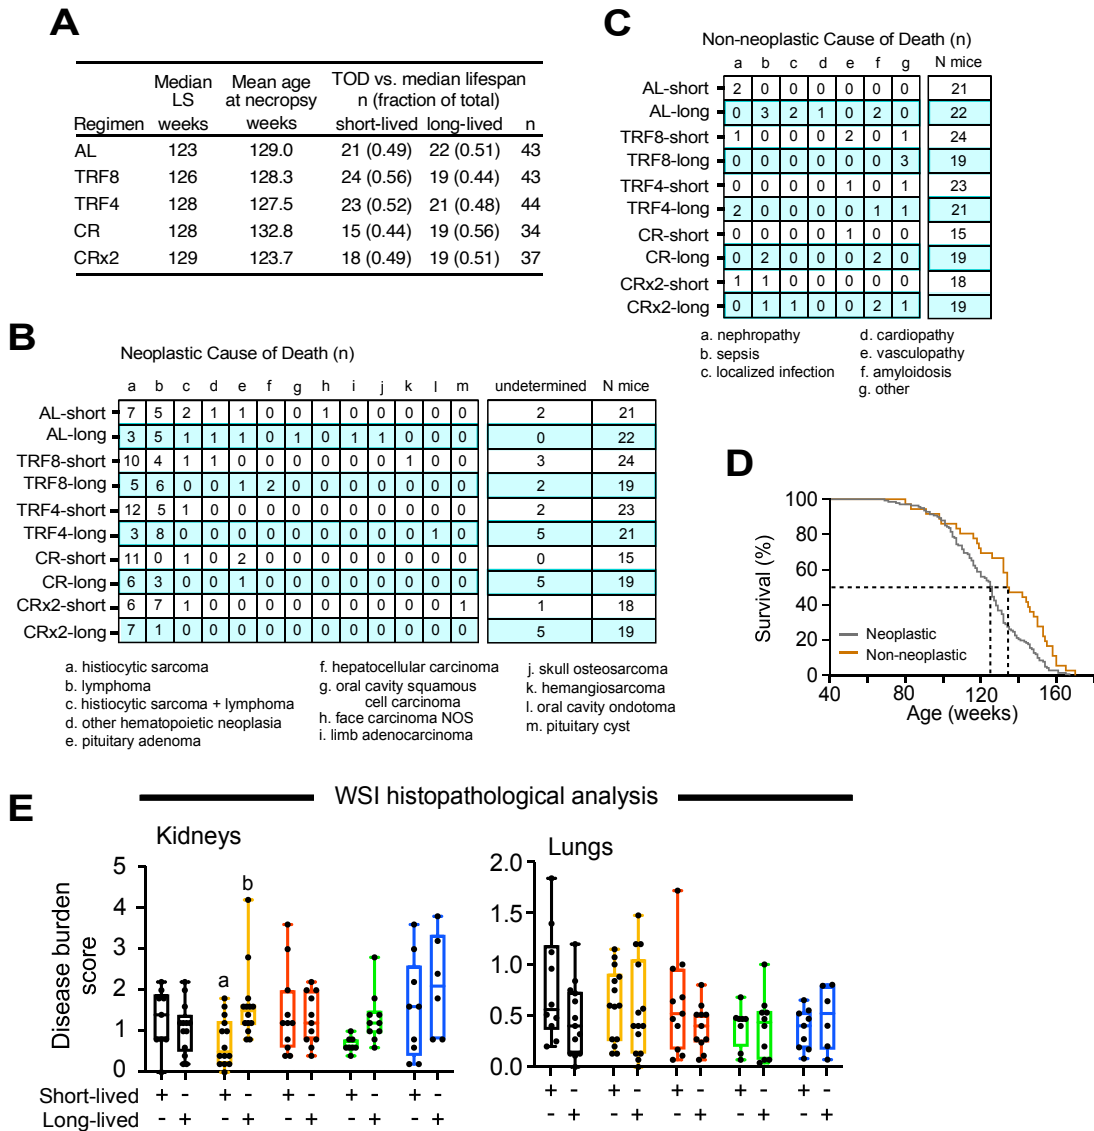

**Figure S3. Most probable cause of death assessment at necropsy.**

(A) Number, median lifespan (LS), and mean age of female mice at necropsy.

(B, C) Neoplastic (B) and non-neoplastic (C) most probable cause of death. The list of various pathologies and tumor histotypes is represented. (AL, n=43; TRF8, n=43; TRF4, n=44; CR, n=34; CRx2, n=37).

(D) Kaplan-Meier survival curves for female mice from all feeding groups that died with neoplastic (n=141) and non-neoplastic (n= 36) diseases, or from undetermined cause (n = 25). Log-rank (Mantel-Cox) test,  $p = 0.0083$ .

(E) Whole-slide image (WSI) histopathological analysis of the kidneys and lungs. Two-way ANOVA coupled with Sidak's post-hoc test was performed to assess the effect of feeding regimen, survival [short- vs. long-lived) and their interaction. Data are represented as box and whisker plots, depicting minimum, lower quartile (Q1), median (Q2), upper quartile (Q3) and maximum values. Different letters indicate statistical significance between short- and long-lived mice at  $p < 0.05$ .

Related to Figure 3B-C.

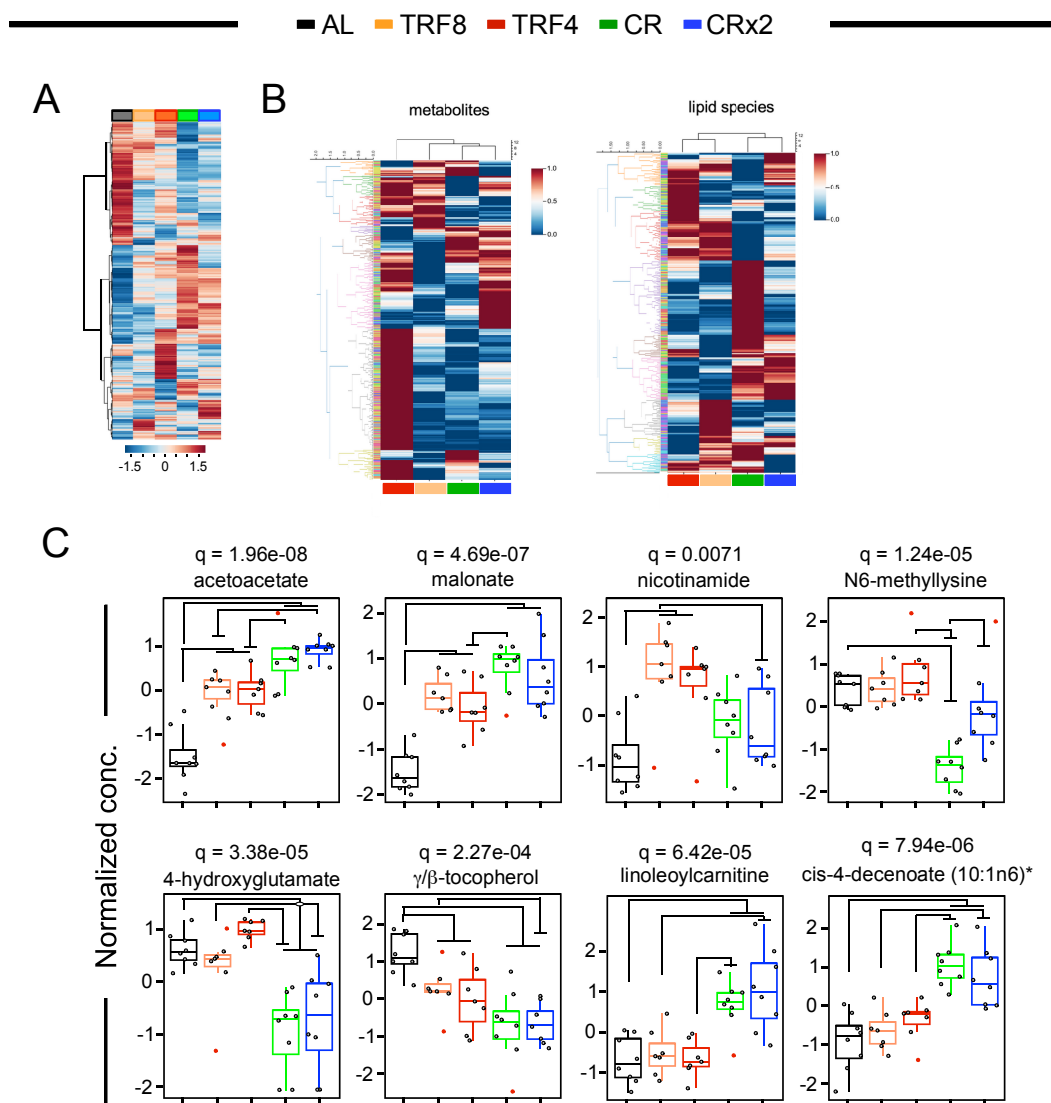

**Figure S4. Impact of long-term feeding regimen on serum metabolomics signature in female mice.**

The metabolomics data set was analyzed with MetaboAnalyst 5.0.

(A) Group averages of the normalized data using autoscale features. AL, n=8; TRF8, n=7; TRF4, n=7; CR, n=8; CRx2, n=8.

(B) Clustering analysis of metabolites (left panel) and lipid species (right panel) present in the serum of TRF4, TRF8, CR, and CRx2 mice vs. AL-fed controls

(C) Boxplots of select metabolites and lipid species present in the five experimental groups (AL, TRF8, TRF4, CR, CRx2). Data are represented as box and whisker plots, depicting minimum, lower quartile (Q1), median (Q2), upper quartile (Q3) and maximum values. q-values describe false discovery rate (FDR) derived from one-way ANOVA.

Related to Figure 4.

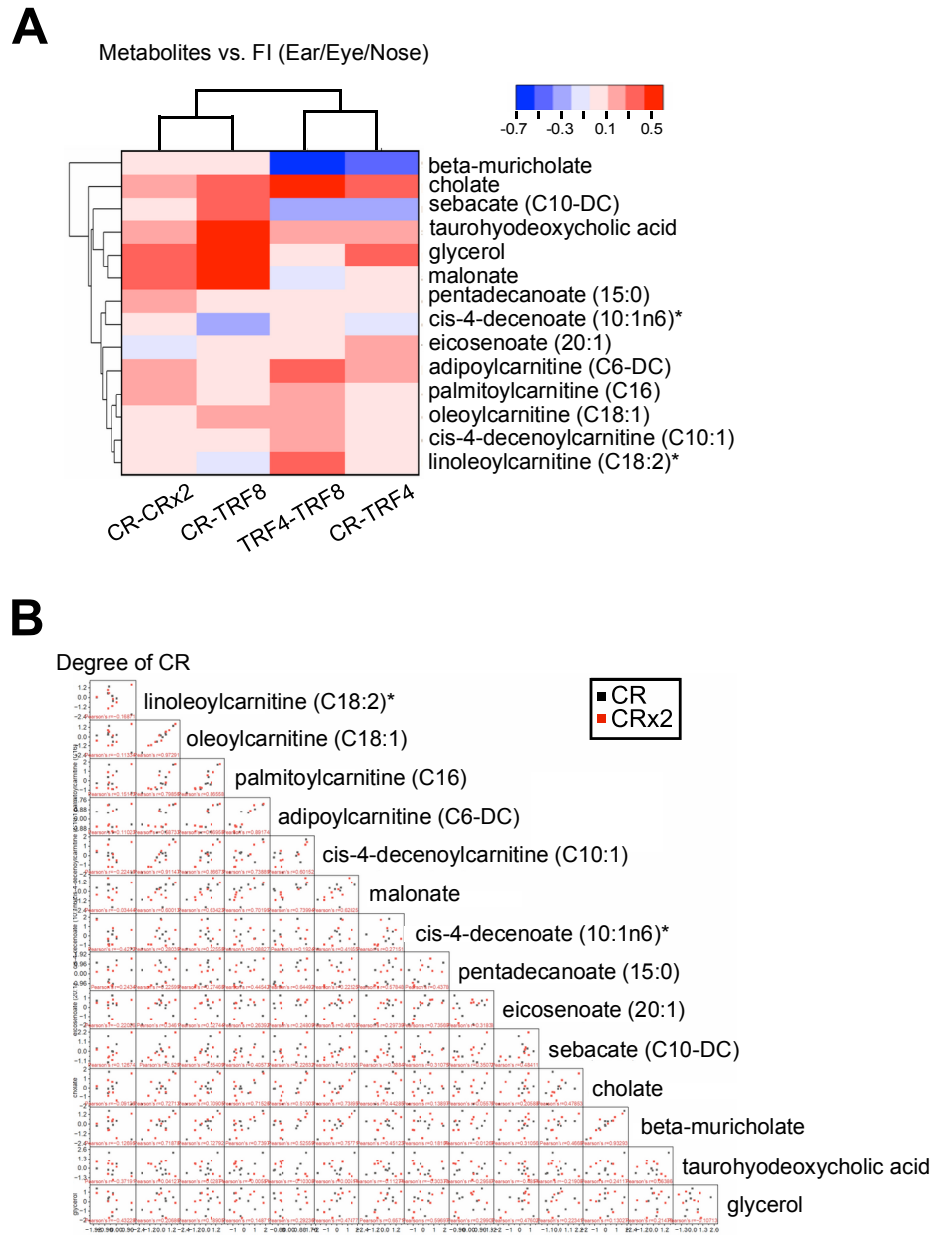

**Figure S5.** Integrated interpretation of various data sets that includes functional signatures of physiological and metabolic outcomes.

(A) Heatmaps of hierarchically clustered correlation coefficients of metabolites vs. Ear/Eye/Nasal FI component

(B) An example of scatter plot matrix of 14 metabolites vs. degree of CR (1st column) and of each metabolite with respect to each one of the other metabolites; the first column of the matrix shows the Pearson correlation coefficients displayed in the Source Data file for Figure 6A-D.

Related to Figure 6.



**Table S1, Related to Figures 1-3 and S3E.** Statistical analysis on the effects of feeding regimens on various physiological and energetic outcomes, and disease burden score.

| <b>Physiological data (Figures 1 and S1) -two-way ANOVA<sup>1</sup></b>  |                              |                                    |                                        |                                        |
|--------------------------------------------------------------------------|------------------------------|------------------------------------|----------------------------------------|----------------------------------------|
| Figure panel                                                             | Measured outcome             | Interaction                        | Feeding regime                         | Time on diet                           |
| Fig. 1D top                                                              | % fat -MRI                   | F (12, 832) = 0.6460<br>P = 0.8034 | F (4, 832) = 4.266<br>P = 0.0020, **   | F (3, 832) = 44.45<br>P < 0.0001, **** |
| Fig. 1D bottom                                                           | Lean/fat ratio -MRI          | F (12, 822) = 1.707<br>P = 0.0606  | F (4, 822) = 9.535<br>P < 0.0001, **** | F (3, 822) = 41.24<br>P < 0.0001, **** |
| Fig. S1F                                                                 | Body weight -MRI             | F (12, 841) = 0.9003<br>P = 0.5463 | F (4, 841) = 5.358<br>P = 0.0003, ***  | F (3, 841) = 26.41<br>P < 0.0001, **** |
| <b>Physiological data (Figures 1 and S1) -one-way ANOVA<sup>2</sup></b>  |                              |                                    |                                        |                                        |
|                                                                          |                              | F (DFn, DFd)                       | P value                                | Kruskal-Wallis                         |
| Fig. 1E, baseline                                                        | 6-h FBG                      | F (4, 35) = 1.444                  | 0.2402                                 |                                        |
| Fig. 1E, 26 wks                                                          | 6-h FBG                      | F (4, 47) = 40.78                  | <0.0001, ****                          |                                        |
| Fig. 1G, 17 wks                                                          | AUC OGTT                     | F (4, 25) = 3.067                  | 0.0348, *                              |                                        |
| Fig. 1G, 39 wks                                                          | AUC OGTT                     | F (4, 25) = 2.753                  | 0.0503                                 |                                        |
| Fig. 1H, 39 wks                                                          | Cagetop (Newtons)            |                                    | <0.0001, ****                          | 5, 64 = 23.86                          |
| Fig. 1I                                                                  | Frailty index score          | F (4, 48) = 7.013                  | 0.0002, ***                            |                                        |
| Fig. 1J                                                                  | Frailty_integumentary        | F (4, 48) = 2.581                  | 0.0489, *                              |                                        |
| Fig. 1J                                                                  | Frailty_musculo-skeletal     | F (4, 48) = 5.190                  | 0.0015, **                             |                                        |
| Fig. 1J                                                                  | Frailty_ear-eye-nose         | F (4, 48) = 3.624                  | 0.0117, *                              |                                        |
| Fig. 1J                                                                  | Frailty_Digestive urogenital | F (4, 48) = 1.189                  | 0.3279                                 |                                        |
| Fig. 1J                                                                  | Frailty Breathing            | F (4, 48) = 2.772                  | 0.0375, *                              |                                        |
| Fig. 1J                                                                  | Frailty Discomfort           | F (4, 48) = 7.075                  | 0.0001, ***                            |                                        |
| Fig. S1C, 4-24 wks                                                       | Food consumed                | F (4, 100) = 200.5                 | <0.0001, ****                          |                                        |
| Fig. S1C, 25-45 wks                                                      | Food consumed                | F (4, 97) = 85.52                  | <0.0001, ****                          |                                        |
| Fig. S1C, 46-66 wks                                                      | Food consumed                | F (4, 100) = 107.3                 | <0.0001, ****                          |                                        |
| Fig. S1C, 4-24 wks                                                       | Body weight                  | F (4, 50) = 19.82                  | <0.0001, ****                          |                                        |
| Fig. S1C, 25-45 wks                                                      | Body weight                  | F (4, 50) = 4.752                  | 0.0025, **                             |                                        |
| Fig. S1C, 46-66 wks                                                      | Body weight                  | F (4, 50) = 4.235                  | 0.0050, **                             |                                        |
| Fig. S1H, 17wks                                                          | AUC OGTT/fat %               |                                    | 0.0081, **                             | 5, 30 = 13.75                          |
| Fig. S1H, 39 wks                                                         | AUC OGTT/fat %               | F (4, 24) = 1.832                  | 0.1556                                 |                                        |
| Fig. S1I, 17 wks                                                         | Rotarod (s)                  | F (4, 111) = 0.7381                | 0.5680                                 |                                        |
| Fig. S1I, 39 wks                                                         | Rotarod (s)                  | F (4, 63) = 3.499                  | 0.0121, *                              |                                        |
| <b>Metabolic cage data (Figures 2 and S2) -One-way ANOVA<sup>2</sup></b> |                              |                                    |                                        |                                        |
| Figure panel                                                             | Measured outcome             | F (DFn, DFd)                       | P value                                |                                        |
| Fig. 2A left, 17 wks                                                     | ΔBW (g)                      | F (4, 25) = 1.806                  | 0.1592                                 |                                        |
| Fig. 2A right, 69 wks                                                    | ΔBW (g)                      | F (4, 24) = 6.226                  | 0.0014, **                             |                                        |
| Fig. 2B left, 17 wks                                                     | Food consumed                | F (4, 25) = 9.264                  | <0.0001, ****                          |                                        |
| Fig. 2B right, 69 wks                                                    | Food consumed                | F (4, 24) = 15.58                  | <0.0001, ****                          |                                        |
| Fig. 2C left, 17 wks                                                     | Food efficiency              | F (4, 25) = 2.281                  | 0.0889                                 |                                        |
| Fig. 2C right, 69 wks                                                    | Food efficiency              | F (4, 24) = 3.219                  | 0.0300, *                              |                                        |
| Fig. S2C top, 17 wks                                                     | RER                          | F (4, 25) = 2.357                  | 0.0810                                 |                                        |
| Fig. S2C bot, 17 wks                                                     | Heat production              | F (4, 25) = 3.963                  | 0.0126, *                              |                                        |
| Fig. S2D top, 69 wks                                                     | RER                          | F (4, 24) = 1.214                  | 0.3307                                 |                                        |
| Fig. S2D bot, 69 wks                                                     | Heat production              | F (4, 24) = 6.457                  | 0.0011, **                             |                                        |
| Fig. 2E top, 17 wks                                                      | X-TOT                        | F (4, 25) = 2.482                  | 0.0686                                 |                                        |

|                                                                                       |                      |                   |                |                      |
|---------------------------------------------------------------------------------------|----------------------|-------------------|----------------|----------------------|
| Fig. 2E bot, 17 wks                                                                   | Z-TOT                | F (4, 25) = 1.012 | 0.4202         |                      |
| <b>WSI -histopathological analysis (Figures 3 and S3E) -two-way ANOVA<sup>1</sup></b> |                      |                   |                |                      |
| Figure panel                                                                          | Measured outcome     | Interaction       | Feeding regime | Short vs. long-lived |
| Fig. 3B - combined                                                                    | Disease burden score | p=0.0030, **      | p=0.0443, *    | p=0.0169, *          |
| Fig. 3C – heart                                                                       |                      | p=0.0668          | p=0.0481, *    | p=0.0120, *          |
| Fig. 3C – liver                                                                       |                      | p=0.0006, ***     | p=0.1743       | p=0.5664             |
| Fig. S3E- kidneys                                                                     |                      | p=0.0780          | p=0.0496, *    | p=0.0315, *          |
| Fig. S3E - lungs                                                                      |                      | p=0.3977          | p=0.2575       | p=0.2082             |

<sup>1</sup>The results were analyzed by two-way ANOVA with Sidak's post-hoc test.

<sup>2</sup>The results were analyzed by one-way ANOVA with Dunnett's post-hoc test

**Table S2, Related to Figure 3A.** Lifespan descriptive statistics and pairwise survival comparisons using Cox Proportional Hazard Regressions.

|          | Mice (n)                              | Lifespan (weeks)                      |      |                                      |      |                                      |      |      |
|----------|---------------------------------------|---------------------------------------|------|--------------------------------------|------|--------------------------------------|------|------|
|          |                                       | Min.                                  | P25% | Median                               | Mean | P75%                                 | P90% | Max. |
| Overall  |                                       |                                       |      |                                      |      |                                      |      |      |
| Cohort*  | 201                                   | 69                                    | 110  | 127                                  | 125  | 143                                  | 152  | 170  |
| Subgroup |                                       |                                       |      |                                      |      |                                      |      |      |
| AL       | 43                                    | 71                                    | 107  | 123                                  | 123  | 143                                  | 149  | 155  |
| CR       | 35                                    | 80                                    | 110  | 128                                  | 129  | 150                                  | 161  | 170  |
| CRX2     | 37                                    | 69                                    | 115  | 129                                  | 127  | 150                                  | 155  | 167  |
| TRF4     | 44                                    | 73                                    | 108  | 128                                  | 125  | 144                                  | 153  | 160  |
| TRF8     | 42                                    | 83                                    | 118  | 126                                  | 125  | 135                                  | 141  | 154  |
| Group    | AL                                    | CR                                    |      | CRX2                                 |      | TRF8                                 |      |      |
| CR       | HR=0.56 (0.35-0.90),<br>pval = 0.026* |                                       |      |                                      |      |                                      |      |      |
| CRX2     | HR=0.70 (0.45-1.10),<br>pval = 0.080  | HR=1.26 (0.79-2.02),<br>pval = 0.361  |      |                                      |      |                                      |      |      |
| TRF8     | HR=0.88 (0.58-1.34),<br>pval = 0.528  | HR=1.61 (1.02-2.55),<br>pval = 0.069  |      | HR=1.27 (0.82-1.98),<br>pval = 0.312 |      |                                      |      |      |
| TRF4     | HR=1.06 (0.70-1.63),<br>pval = 0.612  | HR=1.95 (1.22-3.14),<br>pval = 0.016* |      | HR=1.54 (0.98-2.43),<br>pval = 0.073 |      | HR=1.21 (0.79-1.86),<br>pval = 0.296 |      |      |

\* Only mice that died of natural causes. Abbreviations: P25%, P75%, and P90%, percentile 25, 75, and 90%, respectively; AL, ad libitum; CR, caloric restriction; TRF, time-restricted feeding. HR and pval values were derived from Cox regressions and Log-Rank test, respectively. n= 244 mice (dead: 201; censored: 43).

**Table S3, Related to Figure 3B-3D.** Modification of the grading system performed according to the guidelines of the geropathology grading system for aging mouse studies set by the Geropathology Research Network\*

| Amyloid grading                                       | Tumor grading                                                                                                                        |
|-------------------------------------------------------|--------------------------------------------------------------------------------------------------------------------------------------|
| 0: absent                                             | 0: absent                                                                                                                            |
| 1: amyloid deposits in < 25% of the organ             | 1: benign tumor                                                                                                                      |
| 2: amyloid deposits in 26-50% of the organ            | 2: malignant tumor in < 30% of the organ                                                                                             |
| 3: amyloid deposits in 51-75% of the organ            | 3: malignant tumor in 31-75% of the organ                                                                                            |
| 4: amyloid deposits in > 75% of the organ             | 2: malignant tumor in >75% of the organ                                                                                              |
| Disease burden score calculation in following tissues |                                                                                                                                      |
| Heart                                                 | (Amyloid score + fibrosis score + all other lesions sum) / 3                                                                         |
| Lung                                                  | (Alveolar histiocytosis score + eosinophilic crystalline pneumonia score + inflammation changes average + all other lesions sum) / 5 |
| Kidney                                                | (Glomerular changes sum + tubular changes sum + interstitial changes sum + vascular changes sum + all other lesions sum) / 5         |
| Liver                                                 | (Cellular changes sum + inflammation changes sum + vascular changes sum + tumor sum) / 4                                             |

\* From Snyder et al., 2019.

Table S4. Raw data of the top 25 metabolites responsible for group effects. Related to Figure 4B.

| sample name                         | AL     |       | TRF8   |       | TRF4   |       | CR     |       | CRx2   |       |
|-------------------------------------|--------|-------|--------|-------|--------|-------|--------|-------|--------|-------|
|                                     | AVG    | SD    |
| trans-4-hydroxyproline              | -0.011 | 0.092 | -0.257 | 0.052 | -0.189 | 0.151 | -0.734 | 0.168 | -0.469 | 0.192 |
| equol sulfate                       | -0.131 | 0.314 | -0.646 | 0.244 | -0.283 | 0.425 | -2.006 | 0.422 | -1.386 | 0.277 |
| equol glucuronide                   | -0.144 | 0.335 | -1.063 | 0.181 | -0.369 | 0.525 | -2.397 | 0.768 | -1.282 | 0.241 |
| 2-(4-hydroxyphenyl)propionate       | 0.058  | 0.238 | -0.511 | 0.344 | -0.277 | 0.369 | -1.837 | 0.288 | -1.496 | 0.372 |
| gentisate                           | -0.329 | 0.274 | -1.467 | 0.409 | -0.935 | 0.371 | -1.940 | 0.297 | -1.730 | 0.429 |
| genistein sulfate*                  | -0.086 | 0.670 | -3.419 | 0.831 | -2.844 | 0.564 | -4.336 | 0.464 | -3.304 | 0.495 |
| diazoin sulfate (2)                 | -0.318 | 0.731 | -3.460 | 0.608 | -2.916 | 0.717 | -4.039 | 0.488 | -3.655 | 0.476 |
| glycitein sulfate (2)               | -0.427 | 0.668 | -2.722 | 0.517 | -1.718 | 0.343 | -3.021 | 0.000 | -2.954 | 0.190 |
| 2,6-dihydroxybenzoic acid           | -0.137 | 0.650 | -1.525 | 0.239 | -1.041 | 0.315 | -1.887 | 0.413 | -1.718 | 0.245 |
| docosahexaenoylcarnitine (C22:6)    | 1.072  | 0.230 | -0.073 | 0.192 | 0.277  | 0.271 | -0.299 | 0.539 | -0.094 | 0.199 |
| salicylate                          | 0.155  | 0.510 | -1.061 | 0.255 | -0.644 | 0.323 | -1.619 | 0.144 | -1.496 | 0.149 |
| lysine                              | 0.245  | 0.070 | -0.197 | 0.201 | -0.016 | 0.160 | -0.397 | 0.130 | -0.277 | 0.054 |
| acetoacetate                        | -1.339 | 0.491 | -0.190 | 0.460 | -0.061 | 0.332 | 0.447  | 0.494 | 0.619  | 0.210 |
| 3-hydroxybutyryllysine**            | -1.418 | 1.108 | 0.819  | 0.487 | 0.546  | 0.399 | 1.862  | 0.580 | 1.568  | 0.335 |
| 4-hydroxybutyrate (GBH)             | -0.300 | 0.733 | 1.250  | 0.395 | 1.139  | 0.205 | 1.933  | 0.269 | 1.815  | 0.344 |
| 3-hydroxybutyrate (BHBA)            | -0.333 | 0.744 | 1.236  | 0.328 | 1.109  | 0.250 | 1.851  | 0.283 | 1.764  | 0.346 |
| palmitoleate (16:1n7)               | -0.207 | 0.132 | 0.655  | 0.178 | 0.537  | 0.226 | 1.055  | 0.158 | 0.515  | 0.303 |
| myristate (14:0)                    | -0.105 | 0.185 | 0.619  | 0.164 | 0.631  | 0.140 | 1.037  | 0.164 | 0.508  | 0.339 |
| laurate (12:0)                      | -0.073 | 0.116 | 0.514  | 0.178 | 0.555  | 0.131 | 0.979  | 0.180 | 0.481  | 0.294 |
| 10-nonadecenoate (19:1n9)           | -0.363 | 0.110 | 0.067  | 0.135 | -0.060 | 0.123 | 0.365  | 0.112 | 0.299  | 0.229 |
| oleate/vaccenate (18:1)             | -0.168 | 0.090 | 0.192  | 0.120 | 0.133  | 0.163 | 0.409  | 0.121 | 0.217  | 0.109 |
| linolenate [alpha or gamma; (18:3)] | -0.359 | 0.087 | 0.294  | 0.154 | 0.105  | 0.179 | 0.709  | 0.137 | 0.363  | 0.346 |
| hexadecadienoate (16:2n6)           | -0.209 | 0.189 | 0.407  | 0.250 | 0.178  | 0.227 | 0.943  | 0.212 | 0.516  | 0.288 |
| linoleate (18:2n6)                  | -0.284 | 0.060 | 0.105  | 0.157 | -0.098 | 0.118 | 0.383  | 0.129 | 0.254  | 0.144 |
| 10-heptadecenoate (17:1n7)          | -0.256 | 0.086 | 0.190  | 0.162 | -0.035 | 0.219 | 0.593  | 0.143 | 0.327  | 0.250 |

**Table S5, related to Figure 4 and Fig. S4.** List of serum metabolites significantly and uniquely accumulated in the indicated pairwise comparison. Data were obtained from 4-way Venn diagrams.

| HMDB        | Metabolites                            | -Log(P) |         |           |
|-------------|----------------------------------------|---------|---------|-----------|
|             |                                        | TRF4_AL | TRF8_AL | Shared_AL |
| HMDB0000695 | 4-methyl-2-oxopentanoate               | 3.644   |         |           |
| HMDB0002064 | N-acetylputrescine                     | 0.839   |         |           |
| HMDB0002189 | (N(1) + N(8))-acetylspermidine         | 2.416   |         |           |
| HMDB0003681 | 4-acetamidobutanoate                   | 1.495   |         |           |
| HMDB0004089 | N-formylanthranilic acid               | 1.945   |         |           |
| HMDB0000821 | Phenylacetyl glycine                   | 1.262   |         |           |
| HMDB0041724 | dihydroferulic acid sulfate            | 1.361   |         |           |
| HMDB0000012 | 2'-deoxyuridine                        | 1.483   |         |           |
| HMDB0000930 | Cinnamate                              | 1.658   |         |           |
| HMDB0000622 | Ethylmalonate                          |         | 2.940   |           |
| HMDB0006275 | dopamine 3-O-sulfate                   |         | 1.858   |           |
| HMDB0240459 | 4-methylcatechol sulfate               |         | 1.741   |           |
| HMDB0001406 | Nicotinamide                           |         |         | 3.571     |
| HMDB0000764 | 3-phenylpropionate (hydrocinnamate)    |         |         | 3.180     |
|             | Metabolites                            | CR_AL   | CRx2_AL | Shared_AL |
| HMDB0000317 | 2-hydroxy-3-methylvalerate             | 1.488   |         |           |
| HMDB0011756 | N-acetyl leucine                       | 1.493   |         |           |
| HMDB0000378 | 2-methylbutyrylcarnitine (C5)          | 2.173   |         |           |
| HMDB0002038 | N6-methyllysine                        | 6.070   |         |           |
| HMDB0038670 | S-methylmethionine                     | 2.722   |         |           |
| HMDB0003320 | indole-3-carboxylate                   | 3.012   |         |           |
| HMDB29737   | 3-formylindole                         | 2.714   |         |           |
| HMDB0000232 | Quinolate                              |         | 2.573   |           |
| HMDB0000273 | Thymidine                              |         | 1.521   |           |
| HMDB0000128 | Guanidinoacetate                       |         | 3.023   |           |
| HMDB0000729 | 2-hydroxybutyrate/2-hydroxyisobutyrate |         |         | 3.433     |
| HMDB0000396 | 3-hydroxy-2-ethylpropionate            |         |         | 2.448     |
| HMDB0002035 | 4-hydroxycinnamate                     |         |         | 5.519     |
| HMDB0001344 | 4-hydroxyglutamate                     |         |         | 5.329     |
| HMDB0003464 | 4-guanidinobutanoate                   |         |         | 5.194     |
| HMDB0002108 | S-methylcysteine                       |         |         | 2.612     |
| HMDB0002302 | Indolepropionate                       |         |         | 2.857     |
| HMDB0000214 | Ornithine                              |         |         | 2.983     |
| HMDB0006344 | phenylacetylglutamine                  |         |         | 3.295     |
| HMDB0001870 | Benzoate                               |         |         | 2.673     |
| HMDB0062551 | 4-ethylphenylsulfate                   |         |         | 2.162     |
| HMDB0029968 | ethyl $\alpha$ -glucopyranoside        |         |         | 4.544     |
| HMDB0240658 | 2,8-quinolinediol sulfate              |         |         | 2.257     |
|             | Lipid species                          | CR_AL   | CRx2_AL | Shared    |
| HMDB0061636 | 3-hydroxydecanoylcarnitine             | 3.377   |         |           |
| HMDB0000672 | hexadecanedioate (C16-DC)              | 3.250   |         |           |
| HMDB0000872 | tetradecanedioate (C14-DC)             | 5.033   |         |           |
| HMDB0000131 | Glycerol                               | 2.658   |         |           |
| HMDB0005320 | 1-palmitoyl-2-oleoyl-GPE (16:0/18:1)   | 3.458   |         |           |
| HMDB0000761 | lithocholate                           | 2.030   |         |           |
| HMDB0000874 | taurohyodeoxycholic acid               | 1.976   |         |           |
| HMDB00327   | 1-palmitoyl-GPA (16:0)                 | 3.920   |         |           |

|             |                                             |                |                  |       |
|-------------|---------------------------------------------|----------------|------------------|-------|
| HMDB0011561 | 1-myristoylglycerol (14:0)                  | 3.269          |                  |       |
| HMDB0000114 | glycerophosphoethanolamine                  | 1.563          |                  |       |
| HMDB0000946 | ursodeoxycholate                            |                | 3.060            |       |
| HMDB0013205 | cis-4-decenoylcarnitine (C10:1)             |                |                  | 2.538 |
| HMDB0006469 | linoleoylcarnitine (C18:2)*                 |                |                  | 4.412 |
| HMDB0000792 | sebacate (C10-DC)                           |                |                  | 2.984 |
| HMDB0000409 | 5-hydroxyhexanoate                          |                |                  | 2.728 |
| HMDB0002231 | eicosenoate (20:1)                          |                |                  | 2.552 |
| HMDB0007856 | 1-linoleoyl-GPA (18:2)*                     |                |                  | 2.328 |
| HMDB0004980 | cis-4-decenoate (10:1n6)*                   |                |                  | 4.212 |
| HMDB0000619 | Cholate                                     |                |                  | 3.233 |
| HMDB00502   | 3-dehydrocholate                            |                |                  | 2.923 |
| HMDB0240600 | 1-linoleoyl-GPG (18:2)*                     |                |                  | 2.564 |
| HMDB0240601 | 1-palmitoyl-GPG (16:0)*                     |                |                  | 1.959 |
| HMDB10383   | 2-palmitoleoyl-GPC (16:1)*                  |                |                  | 2.578 |
| HMDB0011565 | 1-palmitoleoylglycerol (16:1)*              |                |                  | 3.914 |
| HMDB0011534 | 2-palmitoleoylglycerol (16:1)*              |                |                  | 4.680 |
| HMDB0008105 | 1-oleoyl-2-linoleoyl-GPC (18:1/18:2)*       |                |                  | 2.096 |
| HMDB0008038 | 1-stearoyl-2-oleoyl-GPC (18:0/18:1)         |                |                  | 4.674 |
|             |                                             |                |                  |       |
|             | <b>metabolites</b>                          | <b>CR TRF4</b> | <b>CRx2 TRF8</b> |       |
| HMDB0000729 | 2-hydroxybutyrate/2-hydroxyisobutyrate      | 2.822          |                  |       |
| HMDB0000532 | N-acetylglycine                             | 3.057          |                  |       |
| HMDB0000317 | 2-hydroxy-3-methylvalerate                  | 1.999          |                  |       |
| HMDB0000396 | 3-hydroxy-2-ethylpropionate                 | 2.109          |                  |       |
| HMDB0000764 | 3-phenylpropionate (hydrocinnamate)         | 0.806          |                  |       |
| HMDB0000128 | guanidinoacetate                            | 0.870          |                  |       |
| HMDB0003464 | 4-guanidinobutanoate                        | 1.207          |                  |       |
| HMDB0038670 | S-methylmethionine                          | 3.170          |                  |       |
| HMDB0003320 | indole-3-carboxylate                        | 1.368          |                  |       |
| HMDB0240347 | N6-carboxymethyllysine                      | 1.350          |                  |       |
| HMDB0000840 | 2-hydroxyhippurate (salicylurate)           | 0.694          |                  |       |
| HMDB0061880 | N-acetyl-beta-alanine                       |                | 2.384            |       |
| HMDB0002035 | 4-hydroxycinnamate                          |                | 1.847            |       |
| HMDB0001406 | nicotinamide                                |                | 1.477            |       |
| HMDB0006335 | γ-tocopherol/β-tocopherol                   |                | 1.990            |       |
| HMDB0004983 | dimethyl sulfone                            |                | 1.249            |       |
|             |                                             |                |                  |       |
|             | <b>Lipid species</b>                        | <b>CR TRF4</b> | <b>CRx2 TRF8</b> |       |
| HMDB0061677 | adipoylcarnitine (C6-DC)                    | 1.949          |                  |       |
| HMDB0013207 | palmitoleoylcarnitine (C16:1)*              | 1.885          |                  |       |
| HMDB0000691 | Malonate                                    | 1.991          |                  |       |
| HMDB0061859 | (14 or 15)-methylpalmitate (a17:0 or i17:0) | 2.267          |                  |       |
| HMDB0002231 | eicosenoate (20:1)                          | 1.869          |                  |       |
| HMDB0000826 | pentadecanoate (15:0)                       | 2.726          |                  |       |
| HMDB0005322 | 1-palmitoyl-2-linoleoyl-GPE (16:0/18:2)     | 2.122          |                  |       |
| HMDB0001161 | deoxycarnitine                              | 1.313          |                  |       |
| HMDB0000824 | propionylcarnitine (C3)                     | 1.669          |                  |       |
| HMDB0002013 | butyrylcarnitine (C4)                       | 3.487          |                  |       |
| HMDB0094649 | 2-aminoheptanoate                           | 1.367          |                  |       |
| HMDB0010384 | 1-stearoyl-GPC (18:0)                       | 1.613          |                  |       |
| HMDB0010395 | 1-arachidonoyl-GPC (20:4n6)*                | 1.237          |                  |       |
| HMDB0011130 | 1-stearoyl-GPE (18:0)                       | 1.342          |                  |       |
| HMDB0000227 | mevalonate                                  | 1.603          |                  |       |

|             |                                                |              |              |              |
|-------------|------------------------------------------------|--------------|--------------|--------------|
| HMDB0011577 | 1-dihomo-linolenylglycerol (20:3)              | <b>1.243</b> |              |              |
| HMDB0008036 | 1,2-distearoyl-GPC (18:0/18:0)                 | <b>1.096</b> |              |              |
| HMDB0000114 | glycerophosphoethanolamine                     | <b>1.431</b> |              |              |
| HMDB0000222 | palmitoylcarnitine (C16)                       |              | <b>0.931</b> |              |
| HMDB0005065 | oleoylcarnitine (C18:1)                        |              | <b>1.471</b> |              |
| HMDB0000321 | 2-hydroxyadipate                               |              | <b>1.143</b> |              |
| HMDB0000792 | sebacate (C10-DC)                              |              | <b>1.199</b> |              |
| HMDB0007856 | 1-linoleoyl-GPA (18:2)*                        |              | <b>1.213</b> |              |
| HMDB0000355 | 3-hydroxy-3-methylglutarate                    |              | <b>1.373</b> |              |
| HMDB0000415 | beta-muricholate                               |              | <b>1.996</b> |              |
| HMDB0000619 | Cholate                                        |              | <b>2.277</b> |              |
| HMDB0000733 | hyodeoxycholate                                |              | <b>1.298</b> |              |
| HMDB0000811 | 6-beta-hydroxylithocholate                     |              | <b>2.097</b> |              |
| HMDB0000946 | ursodeoxycholate                               |              | <b>3.372</b> |              |
| HMDB00502   | 3-dehydrocholate                               |              | <b>2.701</b> |              |
| HMDB0004949 | N-palmitoyl-sphingosine (d18:1/16:0)           |              |              | <b>1.172</b> |
| HMDB0240684 | ceramide (d18:1/20:0, d16:1/22:0, d20:1/18.0)* |              |              | <b>1.570</b> |
| HMDB0000126 | glycerol 3-phosphate                           |              |              | <b>1.198</b> |
| HMDB10383   | 2-palmitoleoyl-GPC (16:1)*                     |              |              | <b>2.713</b> |
| HMDB0008038 | 1-stearoyl-2-oleoyl-GPC (18:0/18:1)            |              |              | <b>1.745</b> |
| HMDB0008147 | 1-linoleoyl-2-arachidonoyl-GPC (18:2/20:4n6)*  |              |              | <b>3.959</b> |

Typeset: AL, **black**; TRF4, **red**; TRF8, **orange**; CR, **green**; CRx2, **blue**.
